# Supplementary material for: Development and Application of Novel Chemiluminescence Immunoassays for Highly Sensitive Detection of Anisakis simplex Proteins in Thermally Processed Seafood
Source: MDPI journal article supplement (doi:10.3390/pathogens9100777), 2020-09-23
Supplement: s1 [file s1]

## ROC curve CL-C-ELISA

|                             |             |
|-----------------------------|-------------|
| Variable                    | RLU         |
| Classification variable     | Result      |
| Sample size                 | 63          |
| Positive group <sup>a</sup> | 56 (88,89%) |
| Negative group <sup>b</sup> | 7 (11,11%)  |

<sup>a</sup> Result = 1

<sup>b</sup> Result = 0

### Area under the ROC curve (AUC)

|                                      |                |
|--------------------------------------|----------------|
| Area under the ROC curve (AUC)       | 0,918          |
| Standard Error <sup>a</sup>          | 0,0353         |
| 95% Confidence interval <sup>b</sup> | 0,821 to 0,972 |
| 95% Bootstrap CI <sup>c</sup>        | 0,824 to 0,969 |
| z statistic                          | 11,867         |
| Significance level P (Area=0.5)      | <0,0001        |

<sup>a</sup> DeLong et al., 1988

<sup>b</sup> Binomial exact

<sup>c</sup> BC<sub>a</sub> bootstrap confidence interval (1000 iterations; random number seed: 978).

### Youden index

|                                      |                  |
|--------------------------------------|------------------|
| Youden index J                       | 0,8571           |
| 95% Confidence interval <sup>a</sup> | 0,7321 to 0,9286 |
| Associated criterion                 | ≤427             |
| 95% Confidence interval <sup>a</sup> | ≤426 to ≤441     |
| Sensitivity                          | 85,71            |
| Specificity                          | 100,00           |

<sup>a</sup> BC<sub>a</sub> bootstrap confidence interval (1000 iterations; random number seed: 978).

### Summary Table

| Estimated specificity at fixed sensitivity |             |                     |           |
|--------------------------------------------|-------------|---------------------|-----------|
| Sensitivity                                | Specificity | 95% CI <sup>a</sup> | Criterion |
| 80,00                                      | 100,00      | 71,43 to 100,00     | ≤414,4    |
| 90,00                                      | 65,71       | 0,00 to 100,00      | ≤430,4    |
| 95,00                                      | 40,00       | 0,00 to 100,00      | ≤442,2    |
| 97,50                                      | 0,00        | 0,00 to 34,29       | ≤451,2    |
| 99,00                                      | 0,00        | 0,00 to 42,86       | ≤454,64   |
| Estimated sensitivity at fixed specificity |             |                     |           |
| Specificity                                | Sensitivity | 95% CI <sup>a</sup> | Criterion |
| 80,00                                      | 85,71       | 71,43 to 92,86      | ≤427,7    |
| 90,00                                      | 85,71       | 73,21 to 92,86      | ≤427,35   |
| 95,00                                      | 85,71       | 73,21 to 92,86      | ≤427,175  |
| 97,50                                      | 85,71       | 0,00 to 0,00        | ≤427,0875 |
| 99,00                                      | 85,71       | 0,00 to 0,00        | ≤427,035  |

<sup>a</sup> BC<sub>a</sub> bootstrap confidence interval (1000 iterations; random number seed: 978).

**Criterion values and coordinates of the ROC curve** [\[Hide\]](#)

| Criterion | Sensitivity | 95% CI      | Specificity | 95% CI       | +LR | -LR  |
|-----------|-------------|-------------|-------------|--------------|-----|------|
| <42       | 0,00        | 0,0 - 6,4   | 100,00      | 59,0 - 100,0 |     | 1,00 |
| ≤42       | 1,79        | 0,05 - 9,6  | 100,00      | 59,0 - 100,0 |     | 0,98 |
| ≤43       | 3,57        | 0,4 - 12,3  | 100,00      | 59,0 - 100,0 |     | 0,96 |
| ≤46       | 7,14        | 2,0 - 17,3  | 100,00      | 59,0 - 100,0 |     | 0,93 |
| ≤47       | 8,93        | 3,0 - 19,6  | 100,00      | 59,0 - 100,0 |     | 0,91 |
| ≤48       | 10,71       | 4,0 - 21,9  | 100,00      | 59,0 - 100,0 |     | 0,89 |
| ≤49       | 12,50       | 5,2 - 24,1  | 100,00      | 59,0 - 100,0 |     | 0,88 |
| ≤55       | 14,29       | 6,4 - 26,2  | 100,00      | 59,0 - 100,0 |     | 0,86 |
| ≤58       | 17,86       | 8,9 - 30,4  | 100,00      | 59,0 - 100,0 |     | 0,82 |
| ≤59       | 19,64       | 10,2 - 32,4 | 100,00      | 59,0 - 100,0 |     | 0,80 |
| ≤61       | 21,43       | 11,6 - 34,4 | 100,00      | 59,0 - 100,0 |     | 0,79 |
| ≤63       | 23,21       | 13,0 - 36,4 | 100,00      | 59,0 - 100,0 |     | 0,77 |
| ≤68       | 25,00       | 14,4 - 38,4 | 100,00      | 59,0 - 100,0 |     | 0,75 |
| ≤71       | 26,79       | 15,8 - 40,3 | 100,00      | 59,0 - 100,0 |     | 0,73 |
| ≤75       | 28,57       | 17,3 - 42,2 | 100,00      | 59,0 - 100,0 |     | 0,71 |
| ≤77       | 30,36       | 18,8 - 44,1 | 100,00      | 59,0 - 100,0 |     | 0,70 |
| ≤79       | 33,93       | 21,8 - 47,8 | 100,00      | 59,0 - 100,0 |     | 0,66 |
| ≤82       | 35,71       | 23,4 - 49,6 | 100,00      | 59,0 - 100,0 |     | 0,64 |
| ≤86       | 37,50       | 24,9 - 51,5 | 100,00      | 59,0 - 100,0 |     | 0,63 |
| ≤108      | 39,29       | 26,5 - 53,2 | 100,00      | 59,0 - 100,0 |     | 0,61 |
| ≤109      | 41,07       | 28,1 - 55,0 | 100,00      | 59,0 - 100,0 |     | 0,59 |
| ≤112      | 42,86       | 29,7 - 56,8 | 100,00      | 59,0 - 100,0 |     | 0,57 |
| ≤114      | 44,64       | 31,3 - 58,5 | 100,00      | 59,0 - 100,0 |     | 0,55 |
| ≤119      | 46,43       | 33,0 - 60,3 | 100,00      | 59,0 - 100,0 |     | 0,54 |
| ≤125      | 48,21       | 34,7 - 62,0 | 100,00      | 59,0 - 100,0 |     | 0,52 |
| ≤129      | 50,00       | 36,3 - 63,7 | 100,00      | 59,0 - 100,0 |     | 0,50 |
| ≤155      | 51,79       | 38,0 - 65,3 | 100,00      | 59,0 - 100,0 |     | 0,48 |
| ≤158      | 53,57       | 39,7 - 67,0 | 100,00      | 59,0 - 100,0 |     | 0,46 |
| ≤165      | 55,36       | 41,5 - 68,7 | 100,00      | 59,0 - 100,0 |     | 0,45 |
| ≤172      | 57,14       | 43,2 - 70,3 | 100,00      | 59,0 - 100,0 |     | 0,43 |
| ≤179      | 58,93       | 45,0 - 71,9 | 100,00      | 59,0 - 100,0 |     | 0,41 |
| ≤181      | 60,71       | 46,8 - 73,5 | 100,00      | 59,0 - 100,0 |     | 0,39 |
| ≤189      | 62,50       | 48,5 - 75,1 | 100,00      | 59,0 - 100,0 |     | 0,38 |
| ≤235      | 64,29       | 50,4 - 76,6 | 100,00      | 59,0 - 100,0 |     | 0,36 |
| ≤251      | 66,07       | 52,2 - 78,2 | 100,00      | 59,0 - 100,0 |     | 0,34 |
| ≤262      | 67,86       | 54,0 - 79,7 | 100,00      | 59,0 - 100,0 |     | 0,32 |
| ≤270      | 69,64       | 55,9 - 81,2 | 100,00      | 59,0 - 100,0 |     | 0,30 |
| ≤285      | 71,43       | 57,8 - 82,7 | 100,00      | 59,0 - 100,0 |     | 0,29 |
| ≤289      | 73,21       | 59,7 - 84,2 | 100,00      | 59,0 - 100,0 |     | 0,27 |
| ≤295      | 75,00       | 61,6 - 85,6 | 100,00      | 59,0 - 100,0 |     | 0,25 |
| ≤407      | 76,79       | 63,6 - 87,0 | 100,00      | 59,0 - 100,0 |     | 0,23 |
| ≤412      | 78,57       | 65,6 - 88,4 | 100,00      | 59,0 - 100,0 |     | 0,21 |
| ≤415      | 80,36       | 67,6 - 89,8 | 100,00      | 59,0 - 100,0 |     | 0,20 |
| ≤417      | 82,14       | 69,6 - 91,1 | 100,00      | 59,0 - 100,0 |     | 0,18 |

|      |        |              |        |              |      |      |
|------|--------|--------------|--------|--------------|------|------|
| ≤426 | 83,93  | 71,7 - 92,4  | 100,00 | 59,0 - 100,0 |      | 0,16 |
| ≤427 | 85,71  | 73,8 - 93,6  | 100,00 | 59,0 - 100,0 |      | 0,14 |
| ≤428 | 85,71  | 73,8 - 93,6  | 71,43  | 29,0 - 96,3  | 3,00 | 0,20 |
| ≤429 | 87,50  | 75,9 - 94,8  | 71,43  | 29,0 - 96,3  | 3,06 | 0,18 |
| ≤430 | 89,29  | 78,1 - 96,0  | 71,43  | 29,0 - 96,3  | 3,13 | 0,15 |
| ≤431 | 91,07  | 80,4 - 97,0  | 57,14  | 18,4 - 90,1  | 2,12 | 0,16 |
| ≤432 | 92,86  | 82,7 - 98,0  | 57,14  | 18,4 - 90,1  | 2,17 | 0,13 |
| ≤434 | 92,86  | 82,7 - 98,0  | 42,86  | 9,9 - 81,6   | 1,63 | 0,17 |
| ≤441 | 94,64  | 85,1 - 98,9  | 42,86  | 9,9 - 81,6   | 1,66 | 0,13 |
| ≤447 | 96,43  | 87,7 - 99,6  | 28,57  | 3,7 - 71,0   | 1,35 | 0,13 |
| ≤449 | 96,43  | 87,7 - 99,6  | 14,29  | 0,4 - 57,9   | 1,12 | 0,25 |
| ≤450 | 96,43  | 87,7 - 99,6  | 0,00   | 0,0 - 41,0   | 0,96 |      |
| ≤452 | 98,21  | 90,4 - 100,0 | 0,00   | 0,0 - 41,0   | 0,98 |      |
| ≤458 | 100,00 | 93,6 - 100,0 | 0,00   | 0,0 - 41,0   | 1,00 |      |

## ROC curve CL-S-ELISA

|                             |             |
|-----------------------------|-------------|
| Variable                    | RLU         |
| Classification variable     | Result      |
| Sample size                 | 63          |
| Positive group <sup>a</sup> | 56 (88,89%) |
| Negative group <sup>b</sup> | 7 (11,11%)  |

<sup>a</sup> Result = 1

<sup>b</sup> Result = 0

### Area under the ROC curve (AUC)

|                                      |                |
|--------------------------------------|----------------|
| Area under the ROC curve (AUC)       | 0,943          |
| Standard Error <sup>a</sup>          | 0,0284         |
| 95% Confidence interval <sup>b</sup> | 0,854 to 0,986 |
| 95% Bootstrap CI <sup>c</sup>        | 0,861 to 0,982 |
| z statistic                          | 15,604         |
| Significance level P (Area=0.5)      | <0,0001        |

<sup>a</sup> DeLong et al., 1988

<sup>b</sup> Binomial exact

<sup>c</sup> BC<sub>a</sub> bootstrap confidence interval (1000 iterations; random number seed: 978).

### Youden index

|                                      |                  |
|--------------------------------------|------------------|
| Youden index J                       | 0,8750           |
| 95% Confidence interval <sup>a</sup> | 0,7500 to 0,9464 |
| Associated criterion                 | >34              |
| 95% Confidence interval <sup>a</sup> | >33 to >34       |
| Sensitivity                          | 87,50            |
| Specificity                          | 100,00           |

<sup>a</sup> BC<sub>a</sub> bootstrap confidence interval (1000 iterations; random number seed: 978).

### Summary Table

| Estimated specificity at fixed sensitivity |             |                     |               |
|--------------------------------------------|-------------|---------------------|---------------|
| Sensitivity                                | Specificity | 95% CI <sup>a</sup> | Criterion     |
| 80,00                                      | 100,00      | 91,92 to 100,00     | >49,2         |
| 90,00                                      | 80,00       | 17,14 to 100,00     | >32,6         |
| 95,00                                      | 50,48       | 3,23 to 100,00      | >31,266666667 |
| 97,50                                      | 25,71       | 0,00 to 60,00       | >30,4         |
| 99,00                                      | 14,29       | 0,00 to 53,75       | >30           |
| Estimated sensitivity at fixed specificity |             |                     |               |
| Specificity                                | Sensitivity | 95% CI <sup>a</sup> | Criterion     |
| 80,00                                      | 90,00       | 78,47 to 96,43      | >32,6         |
| 90,00                                      | 88,75       | 76,78 to 95,36      | >33,3         |
| 95,00                                      | 88,13       | 76,94 to 95,27      | >33,65        |
| 97,50                                      | 87,81       | 0,00 to 0,00        | >33,825       |
| 99,00                                      | 87,62       | 0,00 to 0,00        | >33,93        |

<sup>a</sup> BC<sub>a</sub> bootstrap confidence interval (1000 iterations; random number seed: 978).

**Criterion values and coordinates of the ROC curve** [\[Hide\]](#)

| Criterion | Sensitivity | 95% CI       | Specificity | 95% CI       | +LR  | -LR   |
|-----------|-------------|--------------|-------------|--------------|------|-------|
| ≥30       | 100,00      | 93,6 - 100,0 | 0,00        | 0,0 - 41,0   | 1,00 |       |
| >30       | 98,21       | 90,4 - 100,0 | 14,29       | 0,4 - 57,9   | 1,15 | 0,13  |
| >31       | 96,43       | 87,7 - 99,6  | 42,86       | 9,9 - 81,6   | 1,69 | 0,083 |
| >32       | 91,07       | 80,4 - 97,0  | 71,43       | 29,0 - 96,3  | 3,19 | 0,13  |
| >33       | 89,29       | 78,1 - 96,0  | 85,71       | 42,1 - 99,6  | 6,25 | 0,13  |
| >34       | 87,50       | 75,9 - 94,8  | 100,00      | 59,0 - 100,0 |      | 0,13  |
| >47       | 85,71       | 73,8 - 93,6  | 100,00      | 59,0 - 100,0 |      | 0,14  |
| >48       | 83,93       | 71,7 - 92,4  | 100,00      | 59,0 - 100,0 |      | 0,16  |
| >49       | 80,36       | 67,6 - 89,8  | 100,00      | 59,0 - 100,0 |      | 0,20  |
| >50       | 78,57       | 65,6 - 88,4  | 100,00      | 59,0 - 100,0 |      | 0,21  |
| >51       | 76,79       | 63,6 - 87,0  | 100,00      | 59,0 - 100,0 |      | 0,23  |
| >54       | 75,00       | 61,6 - 85,6  | 100,00      | 59,0 - 100,0 |      | 0,25  |
| >255      | 73,21       | 59,7 - 84,2  | 100,00      | 59,0 - 100,0 |      | 0,27  |
| >260      | 71,43       | 57,8 - 82,7  | 100,00      | 59,0 - 100,0 |      | 0,29  |
| >263      | 69,64       | 55,9 - 81,2  | 100,00      | 59,0 - 100,0 |      | 0,30  |
| >269      | 67,86       | 54,0 - 79,7  | 100,00      | 59,0 - 100,0 |      | 0,32  |
| >278      | 66,07       | 52,2 - 78,2  | 100,00      | 59,0 - 100,0 |      | 0,34  |
| >281      | 64,29       | 50,4 - 76,6  | 100,00      | 59,0 - 100,0 |      | 0,36  |
| >288      | 62,50       | 48,5 - 75,1  | 100,00      | 59,0 - 100,0 |      | 0,38  |
| >576      | 60,71       | 46,8 - 73,5  | 100,00      | 59,0 - 100,0 |      | 0,39  |
| >586      | 58,93       | 45,0 - 71,9  | 100,00      | 59,0 - 100,0 |      | 0,41  |
| >591      | 57,14       | 43,2 - 70,3  | 100,00      | 59,0 - 100,0 |      | 0,43  |
| >608      | 55,36       | 41,5 - 68,7  | 100,00      | 59,0 - 100,0 |      | 0,45  |
| >610      | 53,57       | 39,7 - 67,0  | 100,00      | 59,0 - 100,0 |      | 0,46  |
| >615      | 51,79       | 38,0 - 65,3  | 100,00      | 59,0 - 100,0 |      | 0,48  |
| >622      | 50,00       | 36,3 - 63,7  | 100,00      | 59,0 - 100,0 |      | 0,50  |
| >923      | 48,21       | 34,7 - 62,0  | 100,00      | 59,0 - 100,0 |      | 0,52  |
| >953      | 46,43       | 33,0 - 60,3  | 100,00      | 59,0 - 100,0 |      | 0,54  |
| >967      | 44,64       | 31,3 - 58,5  | 100,00      | 59,0 - 100,0 |      | 0,55  |
| >970      | 42,86       | 29,7 - 56,8  | 100,00      | 59,0 - 100,0 |      | 0,57  |
| >973      | 41,07       | 28,1 - 55,0  | 100,00      | 59,0 - 100,0 |      | 0,59  |
| >987      | 39,29       | 26,5 - 53,2  | 100,00      | 59,0 - 100,0 |      | 0,61  |
| >994      | 37,50       | 24,9 - 51,5  | 100,00      | 59,0 - 100,0 |      | 0,63  |
| >1431     | 35,71       | 23,4 - 49,6  | 100,00      | 59,0 - 100,0 |      | 0,64  |
| >1463     | 33,93       | 21,8 - 47,8  | 100,00      | 59,0 - 100,0 |      | 0,66  |
| >1478     | 32,14       | 20,3 - 46,0  | 100,00      | 59,0 - 100,0 |      | 0,68  |
| >1484     | 30,36       | 18,8 - 44,1  | 100,00      | 59,0 - 100,0 |      | 0,70  |
| >1486     | 28,57       | 17,3 - 42,2  | 100,00      | 59,0 - 100,0 |      | 0,71  |
| >1499     | 26,79       | 15,8 - 40,3  | 100,00      | 59,0 - 100,0 |      | 0,73  |
| >1535     | 25,00       | 14,4 - 38,4  | 100,00      | 59,0 - 100,0 |      | 0,75  |
| >1910     | 23,21       | 13,0 - 36,4  | 100,00      | 59,0 - 100,0 |      | 0,77  |
| >1921     | 21,43       | 11,6 - 34,4  | 100,00      | 59,0 - 100,0 |      | 0,79  |
| >1927     | 19,64       | 10,2 - 32,4  | 100,00      | 59,0 - 100,0 |      | 0,80  |
| >1956     | 17,86       | 8,9 - 30,4   | 100,00      | 59,0 - 100,0 |      | 0,82  |

|       |       |            |        |              |      |
|-------|-------|------------|--------|--------------|------|
| >1974 | 16,07 | 7,6 - 28,3 | 100,00 | 59,0 - 100,0 | 0,84 |
| >1986 | 14,29 | 6,4 - 26,2 | 100,00 | 59,0 - 100,0 | 0,86 |
| >1988 | 12,50 | 5,2 - 24,1 | 100,00 | 59,0 - 100,0 | 0,88 |
| >2185 | 10,71 | 4,0 - 21,9 | 100,00 | 59,0 - 100,0 | 0,89 |
| >2198 | 8,93  | 3,0 - 19,6 | 100,00 | 59,0 - 100,0 | 0,91 |
| >2241 | 7,14  | 2,0 - 17,3 | 100,00 | 59,0 - 100,0 | 0,93 |
| >2256 | 5,36  | 1,1 - 14,9 | 100,00 | 59,0 - 100,0 | 0,95 |
| >2259 | 3,57  | 0,4 - 12,3 | 100,00 | 59,0 - 100,0 | 0,96 |
| >2270 | 1,79  | 0,05 - 9,6 | 100,00 | 59,0 - 100,0 | 0,98 |
| >2285 | 0,00  | 0,0 - 6,4  | 100,00 | 59,0 - 100,0 | 1,00 |
